1 **Classification: Biological Sciences; Cell Biology**

2 ***Drosophila* Sex Peptide Controls the Assembly of Lipid Microcarriers in**

3 **Seminal Fluid**

4

5 S. Mark Wainwright<sup>a</sup>, Cláudia C. Mendes<sup>a</sup>, Aashika Sekar<sup>a</sup>, Benjamin Kroeger<sup>a</sup>, Josephine  
6 E.E.U. Hellberg<sup>a</sup>, Shih-Jung Fan<sup>a</sup>, Abigail Pavey<sup>a</sup>, Pauline Marie<sup>a</sup>, Aaron Leiblich<sup>a</sup>, Carina  
7 Gandy<sup>a</sup>, Laura Corrigan<sup>a</sup>, Rachel Patel<sup>a</sup>, Stuart Wigby<sup>b,c</sup>, John F. Morris<sup>a</sup>, Deborah C.I.  
8 Goberdhan<sup>a</sup>, Clive Wilson<sup>a</sup>

9 <sup>a</sup> Department of Physiology, Anatomy and Genetics, University of Oxford, South Parks Road,  
10 Oxford, OX1 3QX, UK

11 <sup>b</sup> Department of Zoology, University of Oxford, Oxford, OX1 3PS, UK

12 <sup>c</sup> Applied Zoology, Faculty Biology, Technische Universität Dresden, Dresden, Germany

13

14 Corresponding Author: Clive Wilson

15 Tel: 44 1865 282662

16 e-mail: [clive.wilson@dpag.ox.ac.uk](mailto:clive.wilson@dpag.ox.ac.uk)

17

18 Keywords: Reproduction, secretion, seminal proteins, triacylglycerides, Sex Peptide,  
19 *Drosophila*

20 **Abstract**

21 Seminal fluid plays an essential role in promoting male reproductive success and modulating  
22 female physiology and behaviour. In the fruit fly, *Drosophila melanogaster*, Sex Peptide (SP)  
23 is the best-characterised protein mediator of these effects. It is secreted from the paired  
24 male accessory glands (AGs), which, like the mammalian prostate and seminal vesicles,  
25 generate most of the seminal fluid contents. After mating, SP binds to spermatozoa and is  
26 retained in the female sperm storage organs. It is gradually released by proteolytic cleavage  
27 and induces several long-term post-mating responses including ovulation, elevated feeding  
28 and reduced receptivity to remating, primarily signalling through the SP receptor (SPR).  
29 Here, we demonstrate a previously unsuspected SPR-independent function for SP. We show  
30 that, in the AG lumen, SP and secreted proteins with membrane-binding anchors are carried  
31 on abundant, large neutral lipid-containing microcarriers, also found in other SP-expressing  
32 *Drosophila* species. These microcarriers are transferred to females during mating, where  
33 they rapidly disassemble. Remarkably, SP is a key assembly factor for microcarriers and is  
34 also required for the female disassembly process to occur normally. Males expressing non-  
35 functional SP mutant proteins that affect SP's binding to and release from sperm in females  
36 also do not produce normal microcarriers, suggesting that this male-specific defect  
37 contributes to the resulting widespread defects in ejaculate function. Our data therefore  
38 reveal a novel role for SP in formation of seminal macromolecular assemblies, which may  
39 explain the presence of SP in *Drosophila* species, which lack the signalling functions seen in  
40 *D. melanogaster*.

41

42 **Significance Statement**

43 Seminal fluid plays a critical role in reprogramming female physiology and behaviour to  
44 promote male reproductive success. We show in the fruit fly that specific seminal proteins,  
45 including the archetypal ‘female-reprogramming’ molecule Sex Peptide, are stored in male  
46 seminal secretions in association with large neutral lipid-containing microcarriers, which  
47 rapidly disperse in females. Related structures are also observed in other Sex Peptide-  
48 expressing *Drosophila* species. Males lacking Sex Peptide have structurally defective  
49 microcarriers, leading to abnormal cargo loading and transfer to females. Our data reveal  
50 that this key signalling molecule in *Drosophila* seminal fluid is also a microcarrier assembly  
51 factor that controls transfer of other seminal factors, and that this may be a more  
52 evolutionarily ancient role of this protein.

53

54

## 55 Introduction

56 In addition to spermatozoa, semen contains a complex cocktail of macromolecules and  
57 nutrients secreted by the accessory glands of the male reproductive tract. In humans,  
58 seminal plasma nutrients include fructose from the seminal vesicles and triglycerides, both  
59 major energy sources for sperm in the female (1). In addition, enzymes, such as proteases  
60 and lipases, non-enzymatic binding proteins, like lectins and cysteine-rich secretory proteins  
61 (CRISPs), and a wide range of hormones and signalling molecules are major components,  
62 many of them generated in the prostate gland (2, 3). These molecules may be stored for  
63 days in the gland following cellular secretion, prior to being delivered to females during  
64 mating, when mixing of seminal plasma components can trigger enzyme and signal  
65 activation (4). However, the mechanisms that underpin these storage and activation events  
66 are generally not well understood.

67 The paired *Drosophila melanogaster* male accessory glands (AGs) share functional  
68 similarities with both the prostate and seminal vesicles in humans (5). The monolayer  
69 epithelium of these glands is formed from two secretory cell types, about 1000 main cells  
70 and 40 secondary cells at the distal tip (6)(Fig. 1A, A'). This glandular epithelial tube  
71 surrounds a large lumen. The AG secretome and its functions have been extensively  
72 characterised and multiple bioactive Accessory gland proteins (Acps) identified (7, 8).  
73 Several of these induce behavioural and physiological changes in mated females. The  
74 archetypal Acp is Sex Peptide (or Acp70Aa), a 36 amino acid protein, which is synthesised by  
75 main cells (9, 10). On transfer to females following mating, SP effects a comprehensive  
76 reprogramming of female physiology and behaviour. It promotes long-term increases in egg-  
77 laying, reduces female receptivity to remating (11, 12) and affects sperm release (13), diet

78 (14), feeding behaviour (15), water balance (16), defaecation (17), sleep (18), immunity (19),  
79 aggression (20) and memory (21).

80 Maintaining this complex post-mating response (PMR) requires SP association with the  
81 sperm plasma membrane after mating (12). Sperm can then be stored for several weeks in  
82 two female organs, the paired spermathecae and the seminal receptacle, with SP gradually  
83 released by proteolytic cleavage to mediate its effects (22).

84 Studies in which SP or SP mutant peptides are either injected or expressed ectopically in  
85 females have demonstrated that SP can induce many of the characterised female PMRs,  
86 with distinct molecular domains in SP having different functions eg., (9, 23, 24). In females,  
87 the SP receptor (SPR) is required to mediate most of these effects (25). SPR is expressed in  
88 specific neurons of the female reproductive tract that have a key role in the SP-dependent  
89 PMR (26, 27), and in other neurons in the CNS that are also able to respond to circulating SP  
90 (28, 21). In addition, SP appears to produce some SPR-independent post-mating responses  
91 in females (29, 20).

92 Here we report a novel SPR-independent function for SP in males, involving storage and  
93 delivery of seminal components. We show that the AG lumen is filled with many large,  
94 fusiform- and ellipsoid-shaped microcarriers containing a neutral lipid core and coated with  
95 specific proteins such as SP. Microcarriers rapidly dissipate on transfer to females after  
96 mating, providing a simple mechanism for timely release of stored seminal proteins.

97 Surprisingly, we find that SP is essential for assembly of microcarriers in males, and that this  
98 function is required for the normal delivery of microcarrier-associated macromolecules and  
99 nutrients to the female reproductive tract during mating. Furthermore, we identify related  
100 microcarrier structures in other *Drosophila* species that express a Sex Peptide and show that

101 the size and shape of microcarriers has changed as the amino acid sequence of Sex Peptide  
102 evolved in these species.

103

## 104 **Results**

### 105 **The lumen of the accessory gland is filled with large neutral lipid-containing microcarriers**

106 While analysing the lipid content of epithelial cells within the male AG, using the lipophilic  
107 dye Nile Red, which stains membranes and lipid droplets, we observed that the large AG  
108 lumen is filled with fluorescent fusiform structures typically 3-8  $\mu\text{m}$  in length (Fig. 1B, B').  
109 These structures were of variable diameter ranging from less than 0.5  $\mu\text{m}$  to a maximum of  
110 4.0  $\mu\text{m}$  (Fig. S1I). Since these structures were found to bind specific main cell proteins (Fig.  
111 2A), we call them 'microcarriers'. The neutral lipid-specific dye LipidTox Red stained  
112 microcarriers highly selectively (Fig. 1C, C'), suggesting they contain large quantities of  
113 triglycerides and other non-polar lipids. Microcarriers were also detected using high  
114 concentrations of the acidophilic, but partially hydrophobic, LysoTracker dyes (Fig. 1D; (30)).  
115 By contrast, in fixed tissue, microcarriers exclude access to antibodies raised against soluble  
116 secreted AG proteins, such as angiotensin I-converting enzyme (ANCE; Fig. 1E). Microcarriers  
117 are not an artefact of fixation or staining, because they are readily discernable in living  
118 glands using Differential Interference Contrast (DIC) microscopy (Fig. 1F).

119 Previous studies have shown that some transmembrane proteins expressed in epithelial  
120 secondary cells of the AG are secreted on exosomes (31). When transmembrane proteins  
121 were expressed in main cells, they did not associate with microcarriers (Fig. 1G, S1A, A') and  
122 neither did dyes like PKH26 that bind to lipid bilayers (Fig. S1B, B'). A secreted form of GFP,

123 comprised of the SP signal sequence fused to GFP (24), also failed to preferentially bind to  
124 microcarriers (Fig. S1C). By contrast, GFP-GPI, a GFP fusion protein carrying the lipid anchor  
125 glycosylphosphatidylinositol, strongly labelled microcarriers when expressed in main cells  
126 (Fig. 1H, H'), but not when made in secondary cells (Fig. S1D, D'; (32)), consistent with the  
127 idea that main cells produce these structures. Indeed, a concentrated layer of GFP-GPI-  
128 positive staining was observed at the apical surface of main cells overexpressing this  
129 transgene (Fig. 1H'), reflecting the shedding of lipophilic material from these cells. In the  
130 largest microcarriers, GFP-GPI, unlike LipidTox staining (Fig. 1C, C'), was surface-localised  
131 (Fig. 1H, H'), suggesting that these structures have a distinct outer layer, most likely a  
132 phospholipid monolayer into which the GPI anchor is inserted, surrounding the neutral lipid  
133 core. Although microcarrier ultrastructure was difficult to preserve for transmission electron  
134 microscopy, micrographs were consistent with these structures having a homogeneous  
135 internal structure (Fig. S1E).

136

### 137 **Sex Peptide is a microcarrier cargo**

138 An SP-GFP C-terminal GFP fusion protein expressed in main cells under the control of *SP*  
139 gene regulatory elements (33) has previously been used to assess SP transfer to females.  
140 Surprisingly, we found that it strongly associates with microcarriers and concentrates at the  
141 surface of the largest structures, but is present at very low levels within main cells (Fig. 2A,  
142 B; SI Movie 1). When SP-GFP males were mated, fluorescently labelled microcarriers were  
143 transferred to females (Fig. 2C, D). We were unable to detect microcarriers using neutral  
144 lipid stains in the female reproductive tract, at least partly because of poor dye penetration.  
145 However, using SP-GFP as a marker, we found that 25 min after the start of mating (ASM),

146 which is typically within five minutes of the end of mating, microcarriers had already started  
147 to change their morphology (Fig. 2E, E'). Although their basic fusiform shape was frequently  
148 still distinguishable, SP-GFP concentrated in microdomains on the microcarrier surface.  
149 Later, at 45 min ASM, smaller spherical SP-GFP-positive puncta were dispersed throughout  
150 the uterus and SP-GFP was observed on a subset of sperm tails (Fig. 2F, F'), while later still  
151 (60 min ASM), more of the SP-GFP (Fig. 2G, G') was associated with sperm tails. However, at  
152 90 min ASM, only very weak, if any, GFP expression was observed on sperm in the sperm  
153 storage organs (Fig. 2H-I'), either because the most strongly labelled sperm do not migrate  
154 to these organs or because the GFP tag is lost over time. Microcarriers that are ejected from  
155 the AG, but remain in the male ejaculatory duct after mating, do not break down (Fig. 2J, J'),  
156 suggesting that microcarrier dissipation is triggered by physical or chemical signals inside  
157 the uterus.

158 To confirm that C-terminal tagging of SP with GFP does not affect SP's binding properties in  
159 the AG lumen and to begin to dissect out what domains in SP bind to microcarriers, we  
160 overexpressed three SP-GFP fusions in main cells under GAL4/UAS control: the N-terminal  
161 half of mature SP fused at its C-terminus to GFP (SP<sub>n</sub>-GFP), the C-terminal half of SP fused at  
162 its N-terminus to GFP (GFP-SP<sub>c</sub>), and a fusion with GFP located in the centre of the SP  
163 protein (SP<sub>n</sub>-GFP-SP<sub>c</sub>). The latter has been shown to have biological activity in females (24).  
164 Using the main cell-specific *Acp26Aa*-GAL4 driver (Fig. 1A) (11), which expresses at lower  
165 levels than GFP-tagged SP under its own promoter, all SP fusions partitioned with  
166 microcarriers (Fig. S1F-H), albeit less selectively for the N-terminal SP construct, SP<sub>n</sub>-GFP.  
167 Microcarriers therefore appear to bind to both the N- and C-terminal domains of SP. We  
168 conclude that they act as stores for SP, other seminal proteins, such as those with a GPI



169 anchor, and neutral lipids in males, and serve as vehicles for their transfer to females.  
170 Regulated microcarrier disassembly in females presumably assists in the timely release of  
171 lipids and seminal proteins, such as SP, after mating.

172

### 173 **SP controls microcarrier morphology via an SPR-independent mechanism**

174 To assess whether *SP* is involved in microcarrier assembly, we analysed AGs of males  
175 carrying the previously generated *SP*<sup>0</sup> null allele (12), either as a homozygote or in  
176 transheterozygous combination with a small *SP* deficiency, *Df(3L)Δ130* (35, 12). These  
177 transheterozygous *SP* null males have been used to characterise the full range of *SP* mutant  
178 PMR phenotypes (12-21). Unexpectedly, these mutant animals displayed dramatic defects in  
179 microcarrier morphology (Fig. 3A-D, I-J; S2A, B; S3A). Most microcarrier-like structures were  
180 highly enlarged, and either spherical or ellipsoid in shape. The enlarged microcarrier  
181 phenotype was never observed in wild type glands (Fig. 3A, C). In confocal images of the AG  
182 lumen, 10/10 *SP*<sup>0</sup>/*Df(SP)* null glands had microcarriers with a minimum width greater than  
183 10 μm, whereas 0/10 wild type glands contained such structures ( $P < 0.0001$ ; Fisher's exact  
184 test). The enlarged microcarriers from the *SP*<sup>0</sup>/*Df(SP)* null glands were uniformly stained by  
185 LipidTox. They appeared like large lipid droplets under DIC (Fig. 3D). The defects were  
186 absent in *SP*<sup>0</sup> *SP*<sup>+</sup>/*Df(3L)Δ130* males, which express an *SP* genomic rescue construct that  
187 rescues the PMR phenotypes in mated females (12) (Fig. 3E); 0/10 *SP* rescue glands had  
188 microcarriers with a minimum width greater than 10 μm ( $P < 0.0001$  versus *SP*<sup>0</sup>/*Df(SP)*).  
189 Automated measurement of minimum microcarrier diameter in individual images of male  
190 AGs with these different genotypes confirmed the change in size distribution in the *SP* null  
191 background (Fig. 3I). Mating *SP*<sup>0</sup>/*Df(SP)* null males multiple times with females over several

192 days to mix and eject the AG's contents, exacerbated the mutant phenotype, with some  
193 microcarriers spanning the entire diameter of the AG lumen (Fig. 3F, G), suggesting that  
194 microcarriers can enlarge by fusion. When seminal fluid remained in the ejaculatory duct of  
195 *SP<sup>0</sup>/Df(SP)* null males after mating, the duct lumen was also filled with enlarged  
196 microcarriers (Fig. 3H).

197 To confirm that SP expression in main cells is required for normal microcarrier assembly, we  
198 knocked down SP transcripts specifically in these cells, using the GAL4/UAS system (35),  
199 employing the *Acp26Aα*-GAL4 driver (11). Although limited effects were observed when  
200 these experiments were performed at 25°C, expression of SP-RNAis from three different  
201 transgenic lines at 29°C, a temperature that typically enhances GAL4-induced expression  
202 (36), produced consistent marked defects in microcarrier morphology (Fig. 4A-C, Fig. S2C, D,  
203 Fig. S3B). Microcarriers were enlarged in all three knockdowns, though to a lesser extent  
204 than in *SP<sup>0</sup>/Df(SP)* null males. As observed in mated *SP<sup>0</sup>/Df(SP)* null males (Fig. 3G), mating  
205 greatly exacerbated the size phenotype (Fig. 4E, F).

206 In females, many of SP's activities in modulating the female PMR are mediated by the SPR  
207 (25). However, *SPR* mutant males displayed completely normal microcarriers (Fig. 4G),  
208 demonstrating that SP acts independently of the SPR in the male AG, presumably via direct  
209 interaction with microcarriers.

210 Binding of SP to the plasma membrane of sperm in females requires a short peptide  
211 sequence at the N-terminal end of the mature molecule (22). This region must be  
212 proteolytically removed for SP to be released from sperm in the sperm storage organs. Two  
213 mutants expressed under the control of the SP promoter, one that lacks the N-terminal  
214 membrane-association domain (*SP<sup>Δ2-7</sup>*) and the other mutated at the proteolytic cleavage

215 site ( $SP^{QQ}$ ), have both previously been shown to fail to induce the long-term PMR in females  
216 (22). These constructs also failed to rescue the microcarrier phenotype in  $SP^0/Df(SP)$  null  
217 males (Fig. 4H-K; Fig S3C). For both mutants, 7/7 glands had microcarriers with a minimum  
218 width greater than 10  $\mu\text{m}$  (Fig. S3C), suggesting that the N-terminal region of SP, which  
219 appears to bind microcarriers (Fig. S1F), plays an important role in microcarrier assembly, as  
220 well as sperm binding.

221

## 222 **Microcarriers from $SP$ mutant males do not disassemble normally in females after mating**

223 A key property of microcarriers is that they are stable in the male AG, yet change their  
224 morphology within minutes, when transferred to females. We tested how this process is  
225 affected in  $SP$  mutants. Since the C-terminally tagged SP-GFP construct, which has  
226 previously been reported to lack normal SP activity in females (23), failed to rescue the  
227  $SP^0/Df(SP)$  null microcarrier phenotype in males (Fig. 5B), we used this as an alternative to  
228 neutral lipid dyes to mark microcarriers. SP-GFP distributed evenly throughout the enlarged  
229 microcarriers in  $SP^0/Df(SP)$  null males (Fig. 5A, B).

230 Unlike in controls (Fig. 5C), microcarriers from  $SP^0/Df(SP)$  null males failed to rapidly  
231 dissipate in females and instead formed a homogeneously stained mass in the uterus (Fig.  
232 5D), which did not break down during the period when SP-GFP is normally transferred to  
233 sperm tails (compare Fig. 5G, G' with Fig. 5H, H'); indeed, unlike controls, the mass extended  
234 into the anterior uterus with some sperm tails embedded within it. We conclude that  
235 normal dissipation and distribution of microcarrier cargos is disrupted in females mated

236 with *SP<sup>0</sup>/Df(SP)* null males, and this is likely to contribute to the aberrant post-mating  
237 phenotypes observed in mated females.

238

### 239 **SP and microcarrier structure have rapidly co-evolved in *Drosophila* species**

240 To test whether other *Drosophilidae* might employ a similar neutral lipid-based strategy to  
241 package molecules in seminal fluid, we stained the AGs of multiple *Drosophila* species with  
242 LipidTox (Fig. 6). Species closely related to *D. melanogaster*, namely *D. simulans* and *D.*  
243 *sechellia* (Fig. 6A), had microcarriers with remarkably similar size and shape (Fig. 6B-D). AGs  
244 of the species, *D. yakuba*, and *D. erecta*, which are still members of the *melanogaster* group  
245 but have more divergent SP structure (24) (Fig. S4), also contained microcarriers, but these  
246 were more spherical in shape (Fig. 6E, F).

247 Examining more distantly related *Drosophila* species with more diverged SP proteins (Fig.  
248 S4) revealed very different microcarrier organisation. *D. pseudoobscura* and *D. persimilis*,  
249 both members of the *obscura* group, have smaller spherical microcarriers that appear to be  
250 more widely separated (Fig. 6G, H).

251 Two further *Drosophila* species *D. willistoni* and *D. virilis* express forms of SP with major  
252 structural differences to the *melanogaster* and *obscura* groups. These proteins not only lack  
253 a central 10 amino acid portion of the molecule, including the sequence required for  
254 proteolytic cleavage, but have also diverged considerably in other regions with the  
255 exception of the last 15 C-terminal amino acids (Fig. S4). Bright-field and DIC microscopy  
256 revealed *D. willistoni* glands have densely packed globular structures that can be stained  
257 with LipidTox, although this is most clearly observed in punctured glands (Fig. 6I-I''). The *D.*

258 *virilis* AG, whether intact or cut, showed little evidence of LipidTox-stained microcarriers  
259 (Fig. 6J) and bright-field and DIC imaging suggested a more uniform “flocculence” (Fig. 6J’,  
260 J’). Finally, we examined the AGs of *D. mojavensis*, a species that lacks an SP homologue  
261 (Fig. S4). Although there were some large spherical structures in the gland lumen in DIC  
262 images, no LipidTox-positive staining was observed in these glands (Fig. 6K-K’). Therefore,  
263 our analysis suggests that the divergence of SP structure closely parallels changes in  
264 microcarrier shape, size and density.

265

## 266 **Discussion**

267 Seminal fluid plays an essential role in male reproductive success. In *D. melanogaster*, SP,  
268 produced from the male AG, has been highlighted as a central player in this process, acting  
269 via receptors in the female to stimulate changes that increase fecundity and prevent  
270 remating. Here we demonstrate that SP has an additional, unsuspected role in males in the  
271 assembly of neutral lipid-containing microcarriers in the AG lumen (summarised in Fig. 5I).  
272 These microcarriers store SP, other proteins with lipid anchors or potentially hydrophobic  
273 domains, and neutral lipids, so that they can be delivered to females during mating, and  
274 dispersed rapidly in the female reproductive tract. Our analysis of microcarriers in other  
275 *Drosophila* species reveals that SP’s microcarrier assembly function may exist in species in  
276 which SP has more limited roles in modulating the PMR, suggesting that this function might  
277 have been critical in the evolution of this molecule.

278

279 **Lipid microcarriers provide a store, delivery vehicle and dispersal machinery for a subset**  
280 **of seminal proteins.**

281 Seminal proteins are produced throughout adult life, but these proteins are only transferred  
282 to females sporadically. Some of these proteins are then rapidly activated via mechanisms  
283 that are thought to include proteolytic cleavage and pH changes in the female reproductive  
284 tract (discussed in (5)). Our data suggest that microcarriers could contribute to this  
285 activation process. They are repositories for main cell-derived seminal proteins, which  
286 presumably partition from the aqueous phase of the AG's secretions, either because of their  
287 lipophilicity or because they have binding partners on the microcarrier surface. In the male,  
288 molecules like SP bind specifically to microcarriers and not to AG epithelial cells, strongly  
289 suggesting that these surfaces are structurally distinct. Subsequent microcarrier dissipation  
290 in the female reproductive tract provides a mechanism for dispersing proteins like SP, so  
291 they can associate with receptors and cell membranes following mating.

292 Although both staining of normal microcarriers with lipophilic dyes and the homogeneous  
293 internal structure of large defective *SP<sup>0</sup>/Df(SP)* null 'microcarriers' observed with DIC  
294 strongly suggest that neutral lipids are a major component of these structures, their precise  
295 composition remains unclear. In addition, their non-spherical shape in wild type males  
296 suggests that architectural proteins are highly likely to be involved in establishing their final  
297 structure, a proposal supported by the *SP* mutant phenotype. It will now be important to  
298 identify these other structural constituents and to establish whether any of these, unlike SP,  
299 play evolutionarily conserved roles in seminal fluid production outside the *Drosophilidae*  
300 family.

301 Analysis of transcriptomics data from adult *Drosophila* organs reveals high level expression  
302 in the AG of multiple lipases that are predicted to be secreted (eg., CG5162, CG11598,  
303 CG11600, CG11608, CG13034, CG18258, CG18284, CG31872, CG34447; (37), (38), with all  
304 having been detected in proteomics analyses of seminal fluid (39, 8). These include proteins  
305 sharing homology with triacylglycerol lipases (eg., CG5162, CG13034, CG18258, CG34447).  
306 These lipases provide a potential mechanism to break down neutral lipid transferred in  
307 microcarriers to females, so the products can be used as fuel. Mammalian seminal fluid also  
308 contains lipases (40, 41, 42) and triacylglycerides (43, 44), suggesting that the latter may be  
309 required, perhaps as a male-derived nutrient source, in the reproductive system of all higher  
310 organisms.

311 Our identification of extracellular neutral lipid microcarriers as accessible stores of specific  
312 seminal proteins is reminiscent of the role of intracellular lipid droplets in storage of  
313 cytoplasmic and nuclear proteins (45, 46). Lipid droplets are able to dock with specific  
314 intracellular organelles to mediate their functions and deliver their cargos. It will be  
315 interesting to investigate whether the remnants of microcarriers, such as the microdomains  
316 observed with SP-GFP, are in any way targeted to specific cells or structures after transfer to  
317 females, as these storage vehicles break down.

318 It has previously been reported in *Drosophila* that males can adaptively modulate the  
319 relative balance of seminal proteins, including SP, in the ejaculate, depending on female  
320 mating status and the presence of rival males (47, 48). Loading of selected proteins on to  
321 microcarriers might provide a simple mechanism to control such rapid changes, if the  
322 transfer of these large structures can be differentially regulated compared to soluble

323 proteins, for example by controlling the opening of the sphincters through which seminal  
324 fluid passes from the AGs to the ejaculatory duct.

325

326 **Regulation of microcarrier morphology by SP and microcarrier/SP co-evolution in**  
327 ***Drosophila*.**

328 Our study reveals a previously unsuspected male-specific, SPR-independent role for SP in  
329 regulating microcarrier shape and size. *SP* mutants in *D. melanogaster* still have neutral  
330 lipid-containing structures, but they appear to aggregate and fuse, particularly after mating,  
331 to generate large lipid droplet-like structures that no longer retain molecules like SP at their  
332 surface. To date, we have not been able to separate the different activities of SP in males  
333 and females through expression of different mutants or altered SP levels, making it difficult  
334 to fully gauge the importance of the male-specific microcarrier function. However, the  
335 observation that *SP* mutants, which were known to affect binding of SP to the surface of  
336 sperm or its subsequent release, also fail to rescue the microcarrier defect in *SP* null males,  
337 suggests that the interpretation of the phenotypes associated with these mutants requires  
338 some re-evaluation.

339 Tsuda et al. (24) have suggested that SP is likely to have roles in addition to its effects  
340 mediated via SPR signalling in the female reproductive tract, which include induction of a  
341 female sexual refractory period. This is because some SP-expressing species like *D.*  
342 *pseudoobscura* and *D. persimilis* do not appear to express SPR in this location and  
343 additionally show much female less post-mating refractoriness relative to other SP-  
344 producing species (49). Our data (Fig. 6) suggest that microcarrier assembly may be this



345 additional function with the shape of microcarriers rapidly co-evolving with SP, and an  
346 absence of microcarriers in species with a highly divergent (*D. virilis*) or no (*D. mojavensis*)  
347 SP homologue. It will be interesting to investigate whether other proteins with fundamental  
348 roles in packaging and storing seminal fluid components have also evolved signalling roles in  
349 some species.

350 An important conclusion from our study is that the normal transfer of several different  
351 seminal proteins is likely to be interdependent. Elegant studies by the Wolfner lab have  
352 identified several long-term response (LTR) network genes expressed in the AG that are  
353 required either in the male or female for SP to be retained in the sperm storage organs (50,  
354 51, 52). It will be important to investigate whether any of these genes is involved in loading  
355 or unloading SP from microcarriers, or indeed, whether they play a role in microcarrier  
356 assembly. Furthermore, determining whether other Acps or main cell-expressed GPI-  
357 anchored proteins are microcarrier cargos should allow the functions of these structures to  
358 be assessed more extensively and may suggest molecular tools that could be used to screen  
359 for similar processes in higher organisms.

360

## 361 **Materials and Methods**

### 362 ***Drosophila* Stocks and Genetics**

363 Fly stocks were obtained from the following sources: the Bloomington *Drosophila* Stock  
364 Center provided *UAS-GFP.nls* (53)3, *UAS-mCD8-GFP* (54), *tub-GAL80<sup>ts</sup>* (55), *UAS-SP-RNAi#2*  
365 *TRiP.JF02022* (56), *UAS-mCD8-ChRFP*; the Vienna *Drosophila* Resource Center provided *UAS-*  
366 *SP-RNAi#3* (v109175); the Kyoto DGRC Stock Center provided *spi-GAL4* (57); S. Goodwin

367 provided *dsx-GAL4* (58), *Acp26Aa-GAL4* (11), *SP-GFP* (33); T. Aigaki provided *UAS-SPn-GFP-*  
368 *SPc*, *UAS-SPn-GFP*, *UAS-GFP-SPc*, *UAS-sGFP* (24); M. Wolfner provided *SP<sup>QQ</sup>*, *SP<sup>Δ2-7</sup>* (22),  
369 *Df(SPR)* (25); S. Eaton provided *UAS-GFP-GPI* (59); T. Chapman provided *SP<sup>0</sup>*, *SP<sup>0</sup> SP<sup>+</sup>* (12),  
370 *Df(3L)Δ130* (34), *UAS-SP-RNAi-IR2* (RNAi#1; (11)); L. Partridge provided *w<sup>1118</sup>*. A. McGregor  
371 provided *D. simulans*, *D. sechellia*, *D. yakuba*, *D. pseudoobscura*, *D. virilis* and the  
372 Gulbenkian Institute provided *D. erecta*, *D. persimilis*, *D. mojavensis*.

### 373 **Fly husbandry**

374 Flies were maintained on standard cornmeal agar food (12.5 g agar, 75 g cornmeal, 93 g  
375 glucose, 31.5 g inactivated yeast, 8.6 g potassium sodium tartrate, 0.7 g calcium, and 2.5 g  
376 Nipagen [dissolved in 12 ml ethanol] per litre) at 25°C on a 12:12-h light:dark cycle. Males  
377 for *SP* knockdown or those with *tub-GAL80<sup>ts</sup>* were shifted to 29°C on eclosion to activate  
378 UAS-transgenes.

### 379 **Staining and immunostaining of fly reproductive tracts**

380 Unless otherwise stated, 3-4-day-old virgin males were used for AG dissection and for  
381 mating experiments. 4-7-day-old *w<sup>1118</sup>* virgin females were used for mating experiments. For  
382 fixed tissues, reproductive tracts were dissected in 4% paraformaldehyde (Sigma-Aldrich) in  
383 PBS (Gibco). AGs with the ejaculatory duct attached were fixed for 20 min and rinsed at  
384 least four times in PBS prior to further treatments. For females the abdomen was carefully  
385 opened up and fixative allowed to permeate internally for 20 min prior to removal of the  
386 uterus with seminal receptacle, spermathecae and common oviduct attached. Reproductive  
387 tracts were washed four times with PBS.

388 Fixed accessory glands were stained at room temperature in the following solutions and  
389 then washed four times in PBS: 1:50 dilution in PBS of a 10 mg/ml solution of Nile red  
390 (Sigma-Aldrich) dissolved in acetone and incubated for 30 min; 1:100 dilution in PBS of  
391 LysoTracker Deep Red (Life Technologies) for 1 h; 1:50 dilution in PBS of  
392 LipidTox (Invitrogen) for 1 h; 1:40 dilution in diluent C of a 1mM stock of PKH26 red  
393 fluorescent cell marker (Sigma-Aldrich) for 30 min; 1:1000 dilution in PBS of a 10 mg/ml  
394 stock of Hoechst 33342 (Invitrogen) for 5 min.

395 For live imaging, accessory glands were dissected in ice-cold PBS. Live glands requiring  
396 staining were treated for 5 min in a 1:100 dilution of LysoTracker Red DND-99 (Life  
397 Technologies) in ice-cold PBS.

398 For ANCE antibody staining, fixed accessory glands were permeabilised for 6 x 10 min in  
399 PBST (1 X PBS, 0.3% Triton X-100 [Sigma-Aldrich]), blocked for 30 min in PBSTG (PBST, 10%  
400 goat serum [Sigma-Aldrich]) and incubated overnight at 4°C in rabbit anti-ANCE primary  
401 antibody (60) diluted 1:2000 in PBSTG. Glands were then washed for 6 x 10 min in PBST  
402 before incubation in a 1:400 dilution of Cy-5-conjugated donkey anti-rabbit secondary  
403 antibody (Jackson Laboratories) for 2 h at room temperature. Glands were further washed  
404 in PBST for 6 x 10 min prior to mounting.

405 Glands stained with Hoechst were mounted in PBS; all other fixed reproductive tracts were  
406 mounted in Vectashield with DAPI (Vector Laboratories). Glands for live imaging were  
407 mounted in a small drop of ice-cold PBS surrounded by 10S Voltalef (VWR) halocarbon oil  
408 (61).

409 **Electron microscopy**

410 3-day-old *w*<sup>1118</sup> male reproductive tracts were dissected and incubated overnight in 2.5%  
411 glutaraldehyde and 4% formaldehyde in PBS (pH 7.2). Glands were then washed with PBS,  
412 refixed in 1% osmium tetroxide (Agar Scientific) for 20 minutes, washed 3 times in distilled  
413 water and dehydrated through a graded alcohol series and incubated in ethanol and Spurr's  
414 epoxy resin (1:1) (Agar Scientific). Glands were embedded in 100% Spurr's epoxy resin  
415 between two sheets of polythene and polymerised overnight at 60°C. Ultrathin sections  
416 were prepared with a Reichert Ultracut R Ultramicrotome (Leica Biosystems) and mounted  
417 on formvar-coated slot grids (Agar Scientific). Sections were stained with 2% uranyl acetate  
418 and lead citrate (Agar Scientific), and imaged using a JEOL 1010 electron microscope (80kV).

#### 419 **Imaging**

420 Images of fixed reproductive tracts were acquired either on a Zeiss LSM 510 Meta  
421 [Axioplan2] or a LSM 880 laser scanning confocal microscope equipped with Zeiss 10x NA  
422 0.45, 20x NA 0.8, 40x NA 1.3 and 63x NA 1.4 objectives. Live scanning confocal imaging was  
423 performed on a Zeiss LSM 710 microscope using a 63x NA 1.4 objective. Live DIC images  
424 were acquired on a DeltaVision Elite wide-field fluorescence deconvolution microscope (GE  
425 Healthcare Life Sciences) equipped with a 100x, NA 1.4 UPlanSApo oil objective (Olympus).

#### 426 **Automated analysis of microcarrier size**

427 Images were opened with Fiji software. Microcarrier image analysis was performed using  
428 the open-access CellProfiler Software version 2.2.0. A workflow for segmenting all the  
429 microcarriers and measuring the minimum feret diameter of each microcarrier was  
430 developed by adding pre-programmed algorithmic modules in a pipeline. Histograms based

431 on microcarrier minimum width and microcarrier area in different minimum width ranges  
432 were plotted using GraphPad Prism-8 software.

433 Changes in microcarrier size were further assessed by recording the presence or absence of  
434 microcarriers with a minimum width greater than 10  $\mu\text{m}$  for 7-10 glands in a representative  
435 100  $\mu\text{m}^2$  field of view of the lumen midway along the length of the gland. *P*-values were  
436 calculated using Fisher's exact test.

437 All materials, tools and datasets generated in this study are presented in the paper or will be  
438 made available upon request.

#### 439 **ACKNOWLEDGEMENTS**

440 We thank Suzanne Eaton, Mariana Wolfner, Toshiro Aigaki, Tracey Chapman, Stephen  
441 Goodwin, Elwyn Isaac, Nuno Soares and Alistair McGregor for stocks and reagents; we are  
442 grateful to the Bloomington *Drosophila* Stock Center, the Vienna *Drosophila* Resource  
443 Center and the Kyoto DGRC Stock Centre for flies. We thank the Micron Advanced  
444 Bioimaging Unit (supported by Wellcome Strategic Awards 091911/B/10/Z and  
445 107457/Z/15/Z) for their support & assistance in this work. We acknowledge the support of  
446 the Biotechnology and Biological Sciences Research Council (BB/K017462/1, BB/L007096/1,  
447 BB/N016300/1, BB/R004862/1 and a Fellowship to SW, BB/K014544/1), Cancer Research UK  
448 (C19591/A19076, C602/A18974), the Cancer Research UK Oxford Centre Development Fund  
449 (C38302/A12278), and the Wellcome Trust (Strategic Awards #091911, #107457 and  
450 102347/Z/13/Z), as well as the MRC for studentship funding.

451

452



454 **References**

- 455 1. D. Montagnon, B. Valtat, F. Vignon, M. H. Koll-Back, Secretory proteins of human seminal  
456 vesicles and their relationship to lipids and sugars. *Andrologia* **22**, Suppl. 1, 193-205 (1990).
- 457 2. T.L. Veveris-Lowe, S. J. Kruger, T. Walsh, R. A. Gardiner, J. A. Clements, Seminal fluid  
458 characterization for male fertility and prostate cancer: kallikrein-related serine proteases  
459 and whole proteome approaches. *Semin. Thromb. Hemost.* **33**, 87-99 (2007).
- 460 3. J. Vitku, L. Kolatorova, R. Hampl, Occurrence and reproductive roles of hormones in  
461 seminal plasma. *Basic Clin. Androl.* **27**, 19 (2017).
- 462 4. G. Pampalakis, G. Sotiropoulou, Tissue kallikrein proteolytic cascade pathways in normal  
463 physiology and cancer. *Biochim. Biophys. Acta* **1776**, 22-31 (2007).
- 464 5. C. Wilson, A. Leiblich, D. C. Goberdhan, F. Hamdy, The *Drosophila* accessory gland as a  
465 model for prostate cancer and other pathologies. *Curr. Topics Dev. Biol.* **121**, 339-375  
466 (2017).
- 467 6. A. Bairati, Structure and ultrastructure of the male reproductive system in *Drosophila*  
468 *melanogaster*: the genital duct and accessory glands. *Monitore Zool. Ital.* **2**, 105-182 (1968).
- 469 7. L. K. Sirot *et al.*, Molecular social interactions: *Drosophila melanogaster* seminal fluid  
470 proteins as a case study. *Adv. Genet.* **68**, 23-56 (2009).
- 471 8. I. Sepil *et al.*, Quantitative proteomics identification of seminal fluid proteins in male  
472 *Drosophila melanogaster*. *Mol. Cell Proteomics* **18**, S46-58 (2019).
- 473 9. P. S. Chen *et al.*, A male accessory gland peptide that regulates reproductive behavior of  
474 female *D. melanogaster*. *Cell* **54**, 291-298 (1988).

- 475 10. E. Kubli, Sex-peptides: seminal peptides of the *Drosophila* male. *Cell. Mol. Life Sci.* **60**,  
476 1689-1704 (2003).
- 477 11. T. Chapman *et al.*, The sex peptide of *Drosophila melanogaster*: Female post-mating  
478 responses analyzed by using RNA interference. *Proc. Natl. Acad. Sci. USA* **100**, 9923-9928  
479 (2003).
- 480 12. H. Liu, E. Kubli, Sex-peptide is the molecular basis of the sperm effect in *Drosophila*  
481 *melanogaster*. *Proc. Natl. Acad. Sci. USA* **100**, 9929-9933 (2003).
- 482 13. F. W. Avila, K. R. Ram, M. C. Bloch Qazi, M. F. Wolfner, Sex peptide is required for the  
483 efficient release of stored sperm in mated *Drosophila* females. *Genetics* **186**, 595-600  
484 (2010).
- 485 14. C. Ribeiro, B. J. Dickson, Sex peptide receptor and neuronal TOR/S6K signalling modulate  
486 nutrient balancing in *Drosophila*. *Curr. Biol.* **20**, 1000-1005 (2010).
- 487 15. G. B. Carvalho, P. Kapahi, D. J. Anderson, S. Benzer, Allochrine modulation of feeding  
488 behavior by the sex peptide of *Drosophila*. *Curr. Biol.* **16**, 692-696 (2006).
- 489 16. P. Cognigni, A. P. Bailey, I. Miguel-Aliaga, Enteric neurons and systemic signals couple  
490 nutritional and reproductive status with intestinal homeostasis. *Cell Metab.* **13**, 92-104  
491 (2011).
- 492 17. J. Apper-McLaughon, M. F. Wolfner. Post-mating changes in excretion by mated  
493 *Drosophila melanogaster* females is a long-term response that depends on sex peptide and  
494 sperm. *J. Insect Physiol.* **59**, 1024-1030 (2013).



- 495 18. R. E. Isaac, C. Li, A. E. Leedale, A. D. Shirras, *Drosophila* male sex peptide inhibits siesta  
496 sleep and promotes locomotor activity in the post-mated female. *Proc. R. Soc. B* **277**, 65-70  
497 (2010).
- 498 19. J. Peng, P. Zipperlen, E. Kubli. *Drosophila* sex-peptide stimulates female innate immune  
499 system after mating via the Toll and Imd pathways. *Curr. Biol.* **15**, 1690-1694 (2005).
- 500 20. E. Bath *et al.*, Sperm and sex peptide stimulate aggression in female *Drosophila*. *Nat.*  
501 *Ecol. Evol.* **1**, 0154 (2017).
- 502 21. L. Scheunemann, A. Lampin-Saint-Amaux, J. Schor, T. Preat. A sperm peptide enhances  
503 long-term memory in female *Drosophila*. *Sci. Adv.* **5**, eaax342 (2019).
- 504 22. J. Peng, S. Chen, S. Büsser, H. Liu, T. Honegger, E. Kubli, Gradual release of sperm bound  
505 sex-peptide controls female postmating behavior in *Drosophila*. *Curr. Biol.* **15**, 207-213  
506 (2005).
- 507 23. E. V. Domanitskaya, H. Liu, S. Chen, E. Kubli, The hydroxyproline motif of male sex  
508 peptide elicits the innate immune response in *Drosophila* females. *FEBS J.* **274**, 5659-5668  
509 (2007).
- 510 24. M. Tsuda, J. B. Peyre, T. Asano, T. Aigaki, Visualizing molecular functions and cross-  
511 species activity of sex-peptide in *Drosophila*. *Genetics* **200**, 1161-1169 (2015).
- 512 25. N. Yapici, Y. J. Kim, C. Ribeiro, B. J. Dickson A receptor that mediates the post-mating  
513 switch in *Drosophila* reproductive behaviour. *Nature* **451**, 33-37 (2008).
- 514 26. M. Häsemeyer, N. Yapici, U. Heberlein, B. J. Dickson, Sensory neurons in the *Drosophila*  
515 genital tract regulate female reproductive behavior. *Neuron* **61**, 511-518 (2009).

- 516 27. C. H. Yang *et al.*, Control of the postmating behavioral switch in *Drosophila* females by  
517 internal sensory neurons. *Neuron* **61**, 519-526 (2009).
- 518 28. Z. Ding, I. Hausmann, M. Ottiger, E. Kubli, Sex-peptides bind to two molecularly  
519 different targets in *Drosophila melanogaster* females. *J. Neurobiol.* **55**, 372-384 (2003).
- 520 29. I. U. Hausmann, Y. Hemani, T. Wijesekera, B. Dauwalder, M. Soller, Multiple pathways  
521 mediate the sex-peptide-regulated switch in female *Drosophila* reproductive behaviours.  
522 *Proc. Biol. Sci.* **280**, 20131938 (2013).
- 523 30. B. Zhitomirsky, H. Farber, Y. G. Assaraf, LysoTracker and MitoTracker Red are transport  
524 substrates of P-glycoprotein: implications for anticancer drug design evading multidrug  
525 resistance. *J. Cell Mol. Med.* **22**, 2131-2141 (2018).
- 526 31. L. Corrigan *et al.*, BMP-regulated exosomes from *Drosophila* male reproductive glands  
527 reprogram female behavior. *J. Cell Biol.* **206**, 671-688 (2014).
- 528 32. S. Redhai *et al.*, Regulation of dense-core granule replenishment by autocrine BMP  
529 signalling in *Drosophila* secondary cells. *PLoS Genet.* **12**, e1006366 (2016).
- 530 33. A. Villella, J. B. Peyre, T. Aigaki, J. C. Hall, Defective transfer of seminal-fluid materials  
531 during matings of semi-fertile *fruitless* mutants in *Drosophila*. *J. Comp. Physiol. A* **192**, 1253–  
532 1269 (2006).
- 533 34. R. Nolo, L. A. Abbott, H. J. Bellen, *Drosophila Lyra* mutations are gain-of-function  
534 mutations of senseless. *Genetics* **157**, 307-315 (2001).
- 535 35. A. H. Brand, N. Perrimon, Targeted gene expression as a means of altering cell fates and  
536 generating dominant phenotypes. *Development* **118**, 401-415 (1993).

- 537 36. A. H. Brand, A. S. Manoukian, N. Perrimon, Ectopic expression in *Drosophila*. *Methods*  
538 *Cell Biol.* **44**, 635-654 (1994).
- 539 37. J. L. Mueller *et al.*, Cross-species comparison of *Drosophila* male accessory gland protein  
540 genes. *Genetics* **171**, 131-143 (2005).
- 541 38. V. R. Chintapalli, J. Wang, J. A. Dow, Using FlyAtlas to identify better *Drosophila*  
542 *melanogaster* models of human disease. *Nat. Genet.* **39**, 715-720 (2007).
- 543 39. G. D. Findlay, X. Yi, M. J. Maccoss, W. J. Swanson, Proteomics reveals novel *Drosophila*  
544 seminal fluid proteins transferred at mating. *PLoS Biol.* **6**, e178 (2008).
- 545 40. D. A. Carver, B. A. Ball, Lipase activity in stallion seminal plasma and the effect of lipase  
546 on stallion spermatozoa during storage at 5 degrees C. *Theriogenology* **58**, 1587-1595  
547 (2002).
- 548 41. B. Sias *et al.*, Cloning and seasonal secretion of the pancreatic lipase-related protein 2  
549 present in goat seminal plasma. *Biochim Biophys Acta* **1686**, 169-180 (2005).
- 550 42. L. Anel-López *et al.*, Analysis of seminal plasma from brown bear (*Ursus arctos*) during  
551 the breeding season: Its relationship with testosterone levels. *PLoS One* **12**, e0181776  
552 (2017).
- 553 43. F. Vignon, A. Clavert, M. H. Koll-Back, P. Reville, On the glandular origin of seminal  
554 plasma lipids in man. *Andrologia* **24**, 341-343 (1992).
- 555 44. N. S. Juyena, J. Vencato, G. Pasini, I. Vazzana, C. Stelletta, Alpaca semen quality in  
556 relation to different diets. *Reprod. Fertil. Dev.* **25**, 683-690 (2013).

- 557 45. Z. Li *et al.*, Lipid droplets control the maternal histone supply of *Drosophila* embryos.  
558 *Curr. Biol.* **22**, 2104-2213 (2012).
- 559 46. J. A. Olzmann, P. Carvalho, Dynamics and functions of lipid droplets. *Nat. Rev. Mol. Cell.*  
560 *Biol.* **20**, 137-155 (2019).
- 561 47. L. K. Sirot, M. F. Wolfner, S. Wigby, Protein-specific manipulation of ejaculate  
562 composition in response to female mating status in *Drosophila melanogaster*. *Proc. Natl.*  
563 *Acad. Sci. USA* **108**, 9922-992 (2011).
- 564 48. B. R. Hopkins *et al.*, Divergent allocation of sperm and seminal proteome along a  
565 competition gradient in *Drosophila melanogaster*. *Proc. Natl. Acad. Sci. USA* **11**, 17925-  
566 17933 (2019).
- 567 49. T. A. Markow, Evolution of *Drosophila* mating systems. *Evol. Biol.* **29**, 73-106 (1996).
- 568 50. K. R. Ram, M. F. Wolfner, Sustained post-mating response in *Drosophila melanogaster*  
569 requires multiple seminal fluid proteins. *PLoS Genet.* **3**, e238 (2007).
- 570 51. G. D. Findlay, *et al.*, Evolutionary rate covariation identifies new members of a protein  
571 network required for *Drosophila melanogaster* female post-mating responses. *PLoS Genet.*  
572 **10**, e1004108 (2014).
- 573 52. A. Singh, *et al.*, Long-term interaction between *Drosophila* sperm and sex peptide is  
574 mediated by other seminal proteins that bind only transiently to sperm. *Insect Biochem. Mol.*  
575 *Biol.* **102**, 43-51 (2018).

- 576 53. Y. Shiga, M. Tanaka-Matakatsu, S. Hayashi, A nuclear GFP/B-galactosidase fusion protein  
577 as a marker for morphogenesis in living *Drosophila*. *Develop. Growth Differ.* **38**, 99-106  
578 (1996).
- 579 54. T. Lee, L. Luo, Mosaic analysis with a repressible cell marker for studies of gene function  
580 in neuronal morphogenesis. *Neuron* **22**, 451-461 (1999).
- 581 55. L. A. Perkins *et al.*, The transgenic RNAi project at Harvard Medical School: resources and  
582 validation. *Genetics* **201**, 843-852 (2015).
- 583 56. S. E. McGuire, P. T. Le, A. J. Osborn, K. Matsumoto, R. L. Davis, Spatiotemporal rescue of  
584 memory dysfunction in *Drosophila*. *Science* **302**, 1765-1768 (2003).
- 585 57. S. Hayashi *et al.*, GETDB, a database compiling expression patterns and molecular  
586 locations of a collection of Gal4 enhancer traps. *Genesis* **34**, 58-61 (2002).
- 587 58. E. J. Rideout, A. J. Dornan, M. C. Neville, S. Eadie, S. F. Goodwin, Control of sexual  
588 differentiation and behaviour by the *doublesex* gene in *Drosophila melanogaster*. *Nat.*  
589 *Neurosci.* **13**, 458-466 (2009).
- 590 59. V. Greco, M. Hannus, S. Eaton, Argosomes: a potential vehicle for the spread of  
591 morphogens through epithelia. *Cell* **106**, 633-645 (2001).
- 592 60. C. M. Rylett, M. J. Walker, G. J. Howell, A. D. Shirras, R.E. Isaac, Male accessory glands of  
593 *Drosophila melanogaster* make a secreted angiotensin I-converting enzyme (ANCE),  
594 suggesting a role for the peptide-processing enzyme in seminal fluid. *J. Exp. Biol.* **210**, 3601-  
595 3606 (2007).

596 61. R. M. Parton, A. M. Vallés, I. M. Dobbie, I. Davis, Live cell imaging in *Drosophila*

597 *melanogaster*. *Cold Spring Harb. Protoc.* Doi:10.1101/pdb.top75 (2010).

598

599 **Figure legends**

600 **Fig. 1. The accessory gland lumen contains abundant lipophilic microcarriers.**

601 (A, A') Fluorescence image with (A) and without (A') bright-field illumination of paired  
602 *Drosophila melanogaster* male accessory glands (AGs) connecting to the ejaculatory duct  
603 (ed). Main cells express nuclear GFP under *Acp26Aα*-GAL4 main cell-specific control (green),  
604 but secondary cells in distal tip (two of which are marked by yellow arrows in A') do not. (B-  
605 E) Confocal sections through AG lumen stained with Nile Red (B, B'; latter is high  
606 magnification view), LipidTox (C, C'), LysoTracker Deep Red (D; yellow) and anti-ANCE (red),  
607 a soluble secreted protein (E). White arrows mark representative large microcarriers and  
608 arrowheads mark small microcarriers. (F) DIC image of lumen from living AG also reveals  
609 microcarriers (white arrows). (G) Transmembrane CD8-GFP expressed in main cells marks  
610 the apical plasma membrane, but not luminal microcarriers. (H, H') Main cell-expressed  
611 GFP-GPI labels microcarriers at their surface (H, H'; white arrowheads) together with the  
612 apical surface of the epithelial monolayer (H'; yellow arrows). Nuclei marked with Hoechst  
613 (A, A'; blue) or DAPI (B-E, G, H; blue). AG epithelium (ep) (dotted white line in G, H marks  
614 approximate basal surface). Scale bars, 10  $\mu$ m.

615

616 **Fig. 2. SP-GFP is loaded on microcarriers, which disassemble when transferred to females.**

617 (A, B) SP-GFP (green) marks microcarriers in fixed (A) and non-fixed (B) AG lumen, coating  
618 the surface of the largest structures (arrows). (C, D) Combined fluorescence and bright-field  
619 images of reproductive tract of female mated to a control (C) or SP-GFP (D) male dissected  
620 25 min after start of mating (ASM). Anterior (left) and posterior (right) limits of uterus are

621 demarcated by white asterisks, and seminal receptacle (SR), paired spermathecae (Sp),  
622 common oviduct (ov) and mating plug (MP), which autofluoresces in the DAPI channel, are  
623 marked. (E, F) Higher magnification views of posterior uterus at this time reveal microcarrier  
624 structures have changed (E) with SP-GFP concentrated in microdomains (E'; arrow). (F, G)  
625 Later (45 min ASM), many microcarriers have disassembled and some SP-GFP has associated  
626 with sperm tails (ST; F, F'), while later still (60 min ASM), few recognisable microcarriers  
627 remain and many more strongly labelled sperm tails are observed in the anterior uterus (ST  
628 G, G'). Sperm heads (SH) are marked by DAPI. (H, I) Labelled sperm tails (ST) are not present  
629 in the seminal receptacles (60-90 min ASM), which contain sperm heads (SH), both in  
630 females mated with control (H, H') and SP-GFP males (I, I'). (J, J') Microcarriers remaining in  
631 the ejaculatory duct after mating maintain their structure. Outlines of seminal receptacles  
632 (H, I) and ejaculatory duct (J, J') are marked by dotted lines. Nuclei marked with DAPI (blue).  
633 AG and ejaculatory duct epithelia (ep). Scale bars, 10  $\mu\text{m}$  except C, D, 30  $\mu\text{m}$ .

634

635 **Fig. 3. SP is essential for proper assembly of microcarriers.**

636 (A, B) Confocal images of LipidTox-labelled microcarriers in lumen of AG from control (A)  
637 and  $SP^0/Df(SP)$  null (B) males. Mutant male has grossly enlarged microcarriers. (C, D) DIC  
638 images of living AGs dissected from control (C, white arrows) and  $SP^0/Df(SP)$  (D) males. (E)  
639 Microcarrier structural defects in  $SP^0/Df(SP)$  null males are rescued by a genomic  $SP$   
640 construct  $SP^0 SP^+/Df(SP)$ . (F, G) Microcarriers enlarge further after multiple matings in  
641  $SP^0/Df(SP)$  null (G), but not in wild type (F) males. (H) In  $SP^0/Df(SP)$  null males, these  
642 enlarged microcarriers are observed when seminal fluid remains in the lumen of the  
643 ejaculatory duct after mating. (I, J) Microcarrier size and area profiles for glands shown in A,



644 B, E. Microcarrier outlines were detected in images of the AG lumen using CellProfiler  
645 Software version 2.2.0 (see Methods) and then grouped according to minimum width range  
646 (I) or percentage of luminal area occupied by microcarriers in each width range (J). Numbers  
647 of microcarriers within each size range are shown above bars (I).  $SP^0/Df(SP)$  null glands have  
648 considerably fewer small microcarriers ( $<10\ \mu\text{m}$ ) and more large microcarriers ( $>10\ \mu\text{m}$ )  
649 than the other genotypes. The enlarged microcarriers in  $SP^0/Df(SP)$  null glands contain most  
650 of the lipid in the AG lumen, as estimated by LipidTox staining area. Nuclei marked with  
651 DAPI (blue). AG (A-G) or ejaculatory duct (H) epithelium (ep). Scale bars,  $10\ \mu\text{m}$ .

652

653 **Fig. 4. Knockdown of  $SP$  in main cells also produces highly enlarged microcarriers.**

654 All specimens are stained with LipidTox. (A) Confocal image of microcarriers in lumen of AG  
655 from control male. (B-C) Knockdown of  $SP$  in main cells at  $29^\circ\text{C}$  with two RNAis,  $UAS-SP-$   
656  $RNAi\#1$  (B; IR2 from (11)) and  $UAS-SP-RNAi\#2$  (C; TRiP.JF02022) produces enlarged  
657 microcarriers. (D-F) Multiple mating of  $SP$  knockdown males leads to further increases in  
658 microcarrier size (E, F), presumably via fusion, which is not observed in controls (D). (G)  $SPR$   
659 mutant males (homozygous  $Df(1)Exel6234$ ) have normal microcarriers. (H-K) The  $SP^0/Df(SP)$   
660 null phenotype (H) is rescued by a wild type  $SP$  genomic construct in  $SP^0 SP^+/Df(SP)$  males (I),  
661 but not by genomic constructs expressing mutant  $SP^{\Delta 2-7}$  (J) or  $SP^{QQ}$  (K). Nuclei marked with  
662 DAPI (blue). AG epithelium (ep). Scale bar in (A),  $10\ \mu\text{m}$  applies to all panels.

663

664 **Fig. 5. Microcarriers from  $SP$  null males do not dissipate normally when transferred to**  
665 **females during mating.**

666 (A, B) A genomic SP-GFP fusion construct labels *SP* wild-type microcarriers (A), and enlarged  
667 defective microcarriers in the AG of *SP<sup>0</sup>/Df(SP)* null males, though it does not rescue the  
668 associated microcarrier phenotype (B). (C-F) Combined fluorescence and bright-field images  
669 at 25-30 min ASM of whole reproductive tracts (anterior on left; C, D) and posterior uterus  
670 at higher magnification (E, F) from females mated either with control males expressing SP-  
671 GFP (C, E) or with *SP<sup>0</sup>/Df(SP)* null males expressing SP-GFP (D, F). Microcarrier-like structures  
672 from the *SP<sup>0</sup>/Df(SP)* null male are fused together in a globular mass, whereas microcarriers  
673 from control males do not fuse, but carry localised SP-GFP puncta. (G, H) At 45-50 min ASM,  
674 SP-GFP-positive material remains in a globular mass in females mated with *SP<sup>0</sup>/Df(SP)* null  
675 males, which extends into the anterior uterus, unlike controls (H, H'). This mass contains a  
676 few intensely labelled sperm tails (arrows). By contrast, SP-GFP from wild type males has  
677 dispersed, although some intense fluorescent puncta remain (G, G'), and often many sperm  
678 tails in the anterior uterus are labelled (arrows in G'). (I) Schematic representing  
679 microcarrier structure in accessory glands of wild-type and *SP<sup>0</sup>/Df(SP)* null males, as  
680 visualised using the SP-GFP fusion protein, and the changes that take place 25-30 min ASM  
681 in the female reproductive tract. In (C, D), anterior (left) and posterior (right) boundaries of  
682 uterus are demarcated by asterisks and seminal receptacle (SR), one of the two  
683 spermathecae (Sp), oviduct (ov) and mating plug (MP) are labelled. Nuclei marked with DAPI  
684 (blue). AG epithelium (ep), uterine epithelium (Uep). Scale bars, 10  $\mu$ m except for C, D, 30  
685  $\mu$ m.

686

687 **Fig. 6. Co-evolution of microcarrier morphology and SP in *Drosophila* species.**

688 (A) Phylogenetic tree of *Drosophila* species used in this study. All species except *D.*  
689 *mojavensis* have a putative SP homologue. Adapted from <http://flybase.org/blast/>. (B-K)  
690 LipidTox staining of AGs from 6-day-old virgin males from selected *Drosophila* species,  
691 namely *D. melanogaster* (B), *D. simulans* (C), *D. sechellia* (D), *D. erecta* (E), *D. yakuba* (F), *D.*  
692 *pseudoobscura* (G), *D. persimilis* (H), *D. willistoni* (I), *D. virilis* (J) and *D. mojavensis* (K). For (I-  
693 K), where LipidTox microcarriers are not readily detectable, bright-field images of the same  
694 glands are shown (I'-K'), as well as DIC images (I''-K'') of different glands. Insets in (I, J, K) are  
695 images of AG with epithelial layer punctured to fully expose luminal contents to LipidTox  
696 stain, revealing stained structures only in *D. willistoni*. Note that different subgroups have  
697 noticeably different microcarrier size, shape and density. Nuclei marked with DAPI (blue).  
698 AG epithelium (ep). All scale bars, 10  $\mu\text{m}$ ; scale bar in (B) applies to (B-H); in (I), applies to (I-  
699 K) and (I'-K'); and in (I'') applies to (I''-K'').

700

701

702

703

704

705 **Supplementary Figures.**

706 **Fig. S1. Structure and cargos of accessory gland microcarriers.**

707 (A, B) Both main cell-expressed transmembrane CD8-RFP (A) and the lipid bilayer dye PKH26  
708 (B) mark the main cell apical membrane (A', B'), but not the luminal microcarriers labelled  
709 by SP-GFP (merge in A, B). (C) Secreted GFP is not preferentially partitioned on to  
710 microcarriers. (D) In the AG lumen, secreted secondary cell-expressed GFP-GPI is primarily  
711 associated with puncta (arrowheads; cell boundaries seen in bright-field image; D') and does  
712 not appear to be loaded on to microcarriers. (E) Transmission electron micrograph of AG  
713 lumen showing a range of sizes of microcarriers (arrowheads) (F-H). The N-terminus of  
714 mature SP with a C-terminal GFP tag (F; SP<sub>n</sub>-GFP), full length SP with a central GFP tag (G;  
715 SP<sub>n</sub>-GFP-SP<sub>c</sub>) and the C-terminus of SP with an N-terminal GFP tag (H; GFP-SP<sub>c</sub>) all  
716 concentrate on microcarriers when expressed in main cells albeit at lower levels for SP<sub>n</sub>-  
717 GFP. (I) Size distribution of microcarriers in LipidTox-stained AG lumen from image in Fig.  
718 1B'. Nuclei marked with DAPI (blue). AG epithelium (ep). Scale bars, 10 μm.

719

720 **Fig. S2. Loss or reduction of SP disrupts microcarrier morphology.**

721 (A-D) LipidTox-stained microcarriers are highly enlarged in *SP<sup>0</sup>/SP<sup>0</sup>* homozygous males (B)  
722 when compared to controls (A). Expressing a third RNAi targeting *SP* transcripts (*UAS-SP-*  
723 *RNAi#3*; v109175) induces the formation of enlarged microcarriers (D), unlike controls (C).  
724 Nuclei marked with DAPI (blue). AG epithelium (ep). Scale bars, 10 μm.

725

726 **Fig. S3. *SP* mutant, *SP* RNAi and some *SP* rescue glands have enlarged microcarriers.**

727 (A-C) Histograms showing percentage of microcarrier area within given microcarrier  
728 minimum width ranges. (A) More lipid is incorporated into microcarriers in larger size ranges  
729 in homozygous  $SP^0/SP^0$  gland (from Fig. S2B) than in control glands (Fig. S2A). (B) *SP*-RNAi  
730 knockdown in main cells increases the incorporation of lipid into larger microcarriers (from  
731 glands shown in Fig. 4B, C) compared with control glands (Fig. 4A). (C) Expression of  $SP^{\Delta 2-7}$  or  
732  $SP^{QQ}$  (from glands shown in Fig. 4J, K) fails to rescue the  $SP^0/Df(SP)$  null phenotype (Fig 4H)  
733 when compared with  $SP^0 SP^+/Df(SP)$  rescue (Fig. 4I). Main cell (MC).

734

735 **Fig. S4. Rapid evolution of *SP* sequences correlates with changes in microcarrier**  
736 **morphology, size and abundance in diverse *Drosophila* species.**

737 *SP* protein sequence alignment for the different *Drosophila* species used in this study.  
738 Species are clustered according to subgroup. Conserved amino acids are highlighted or  
739 underlined; blue = conserved across all *SP*-expressing species; green = conserved in  
740 *melanogaster* and *obscura* groups; pink = conserved in *melanogaster* group; grey, brown or  
741 yellow = conserved within a single species cluster. The subdivision of these groups  
742 correlates with *SP* protein sequence, and shape, size and abundance of microcarriers in each  
743 species. Adapted from (24).

744

745 **SI Movie 1. Live imaging of *SP*-GFP-labelled microcarriers.**

746 Z stack through distal tip of live SP-GFP AG. LysoTracker-Red (red; used at high  
747 concentrations) marks epithelial layer of gland. Confocal sections were captured at 1.5  $\mu\text{m}$   
748 intervals on Z axis.

749

750

751

752

753 **Fig. 1**

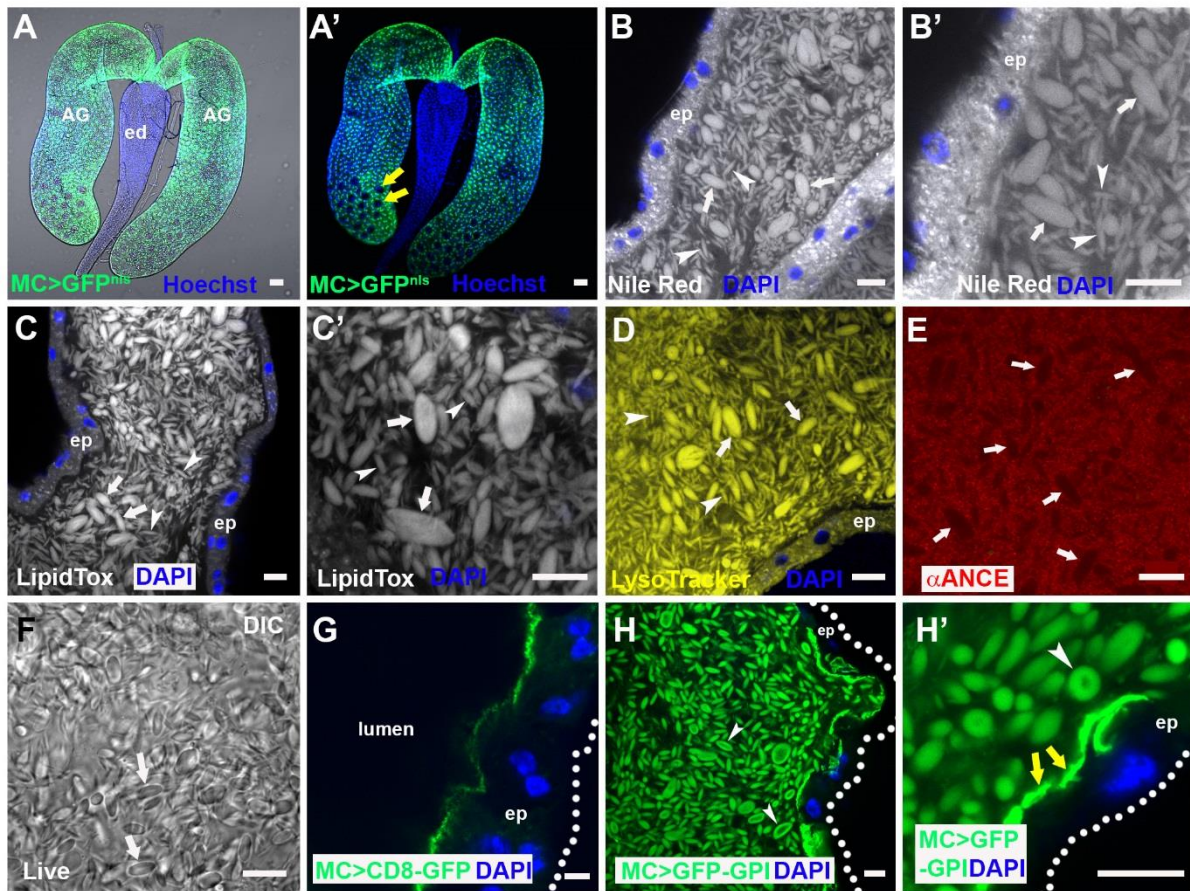

754

755

756 Fig. 2

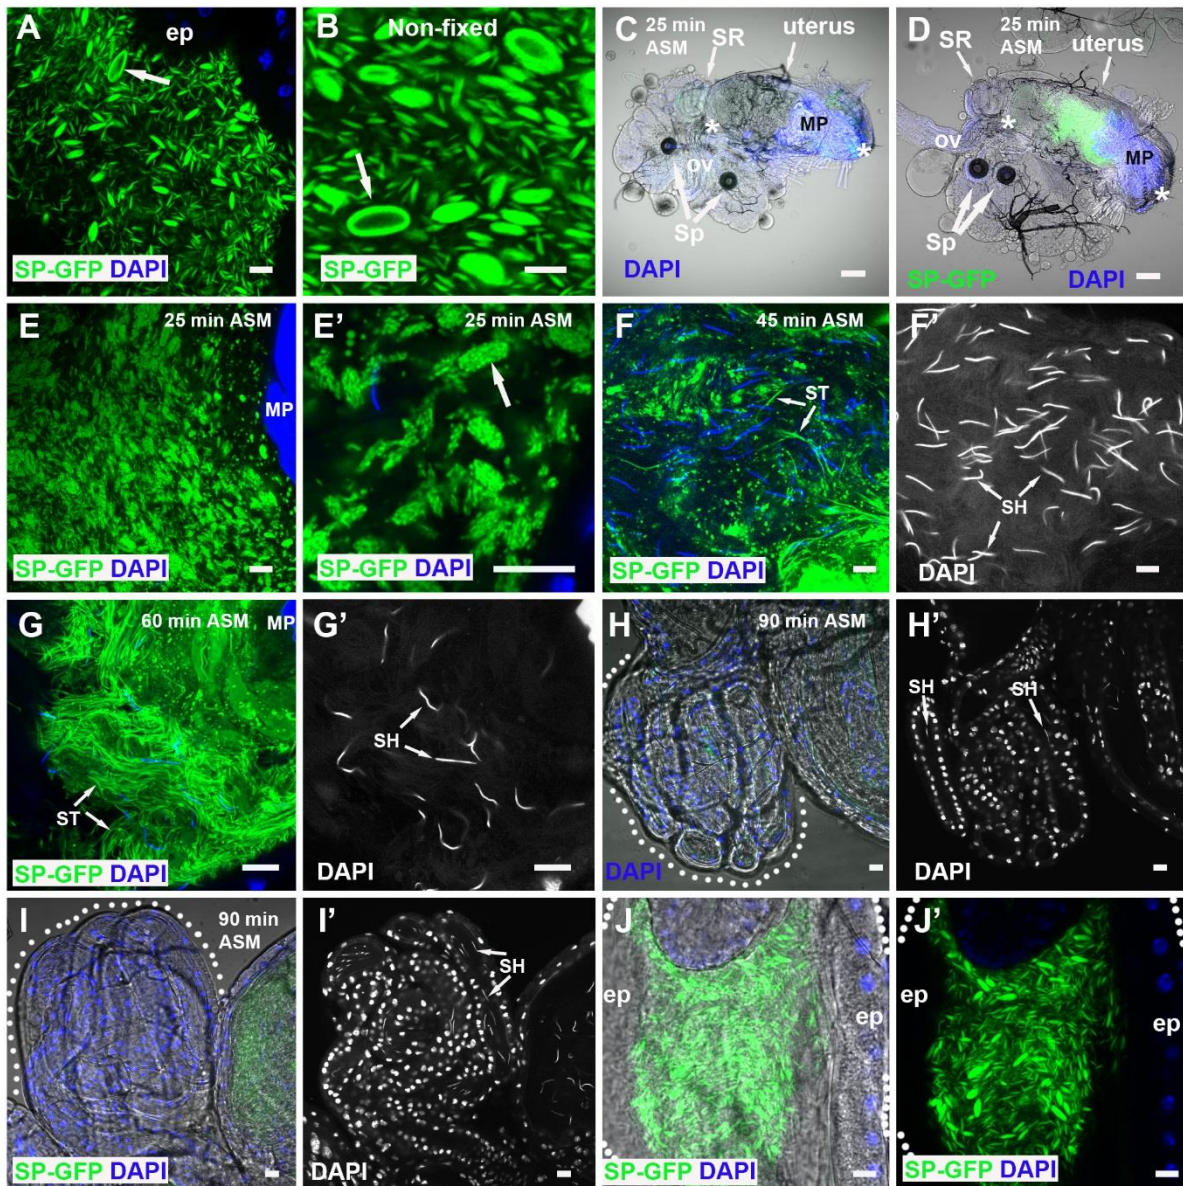

757

758

759



760 **Fig. 3**

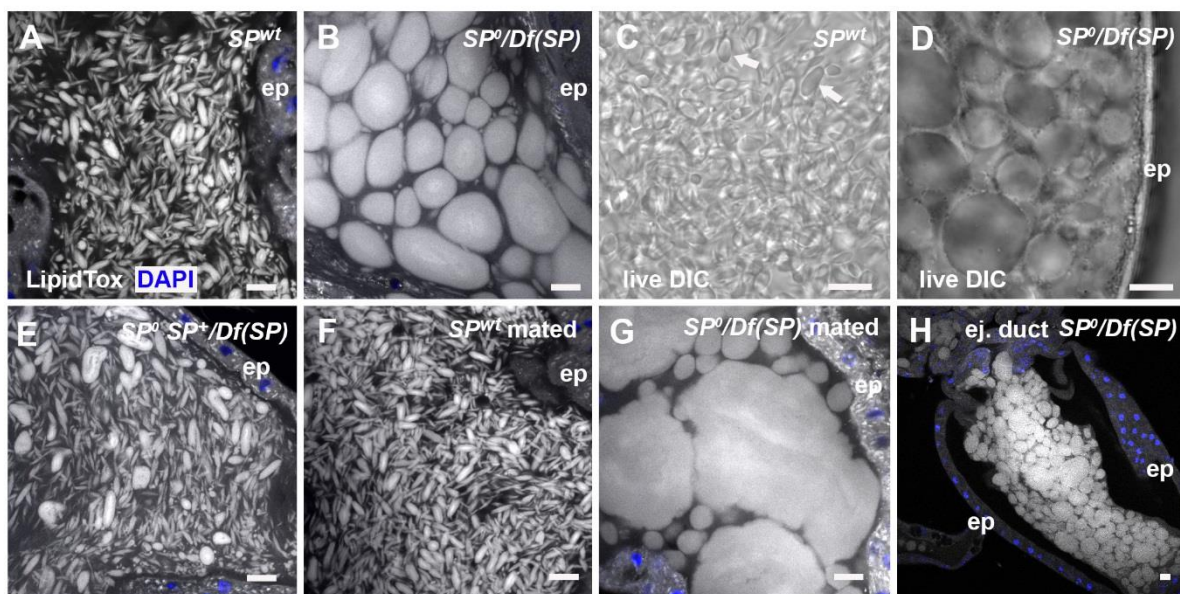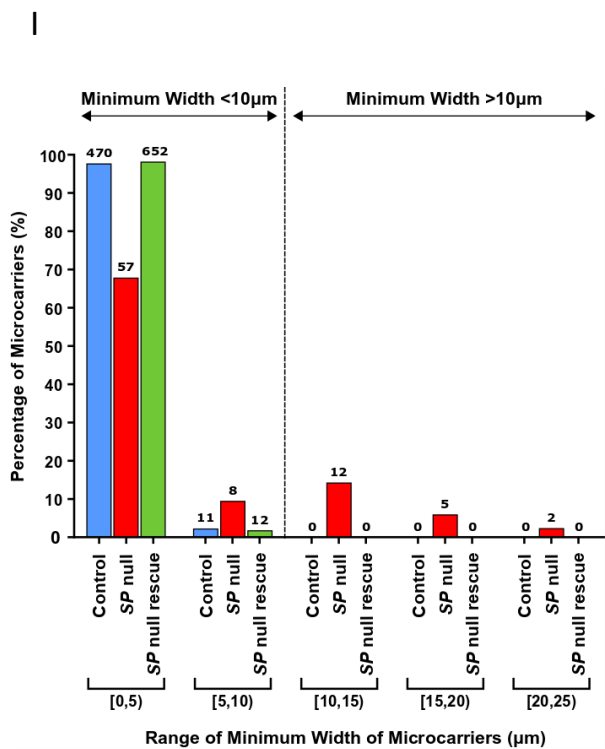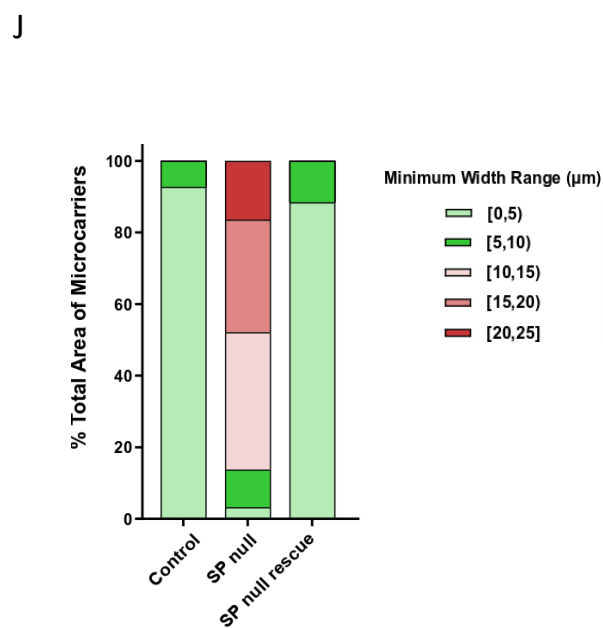

761

762

763 **Fig. 4**

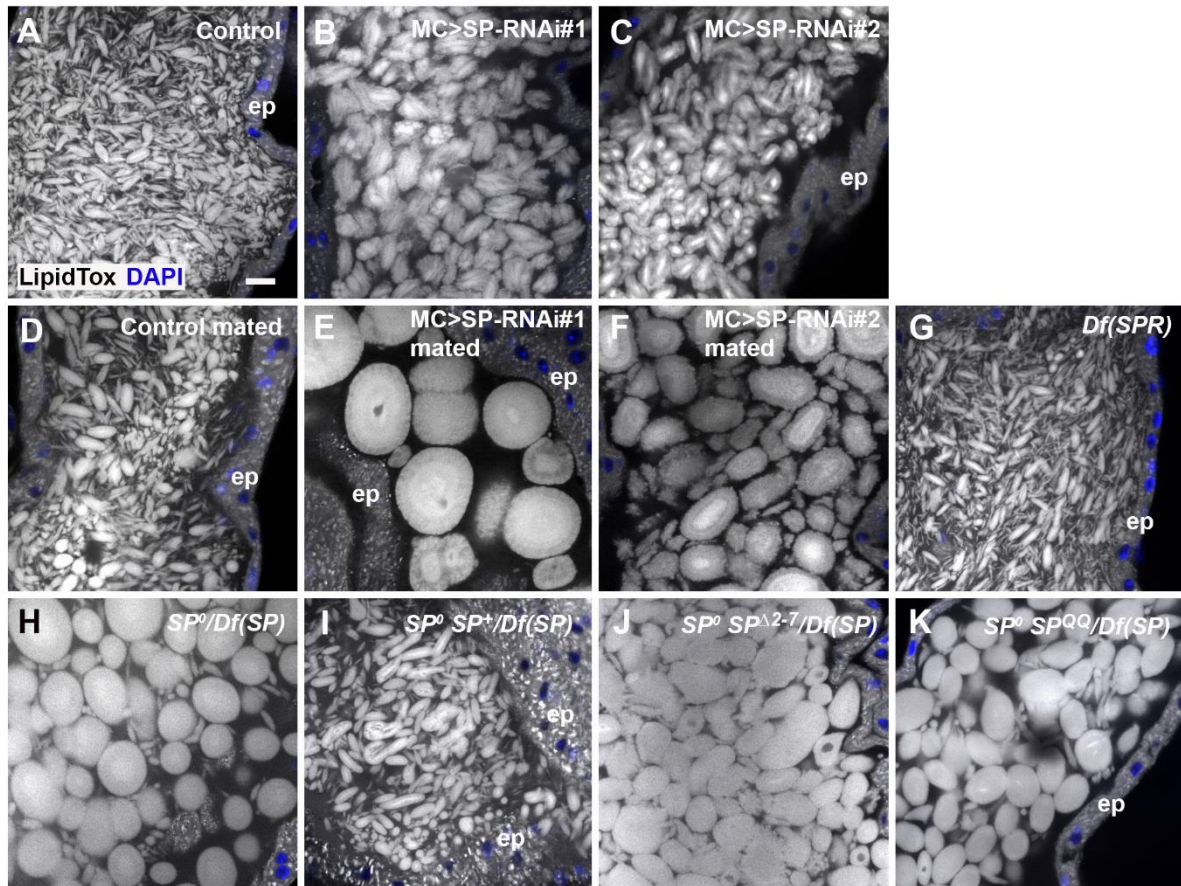

764

765

766 Fig. 5

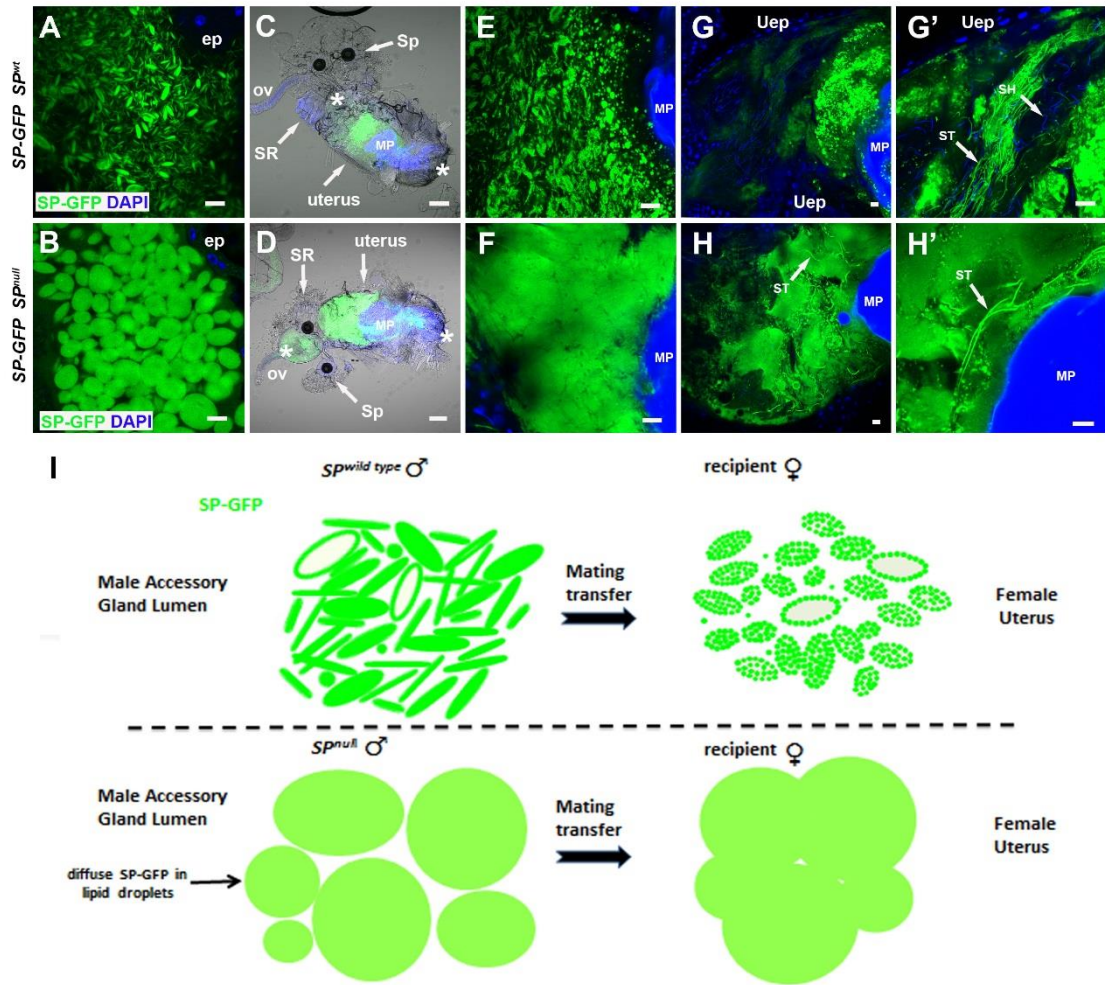

767

768

769

770

771 **Fig. 6**

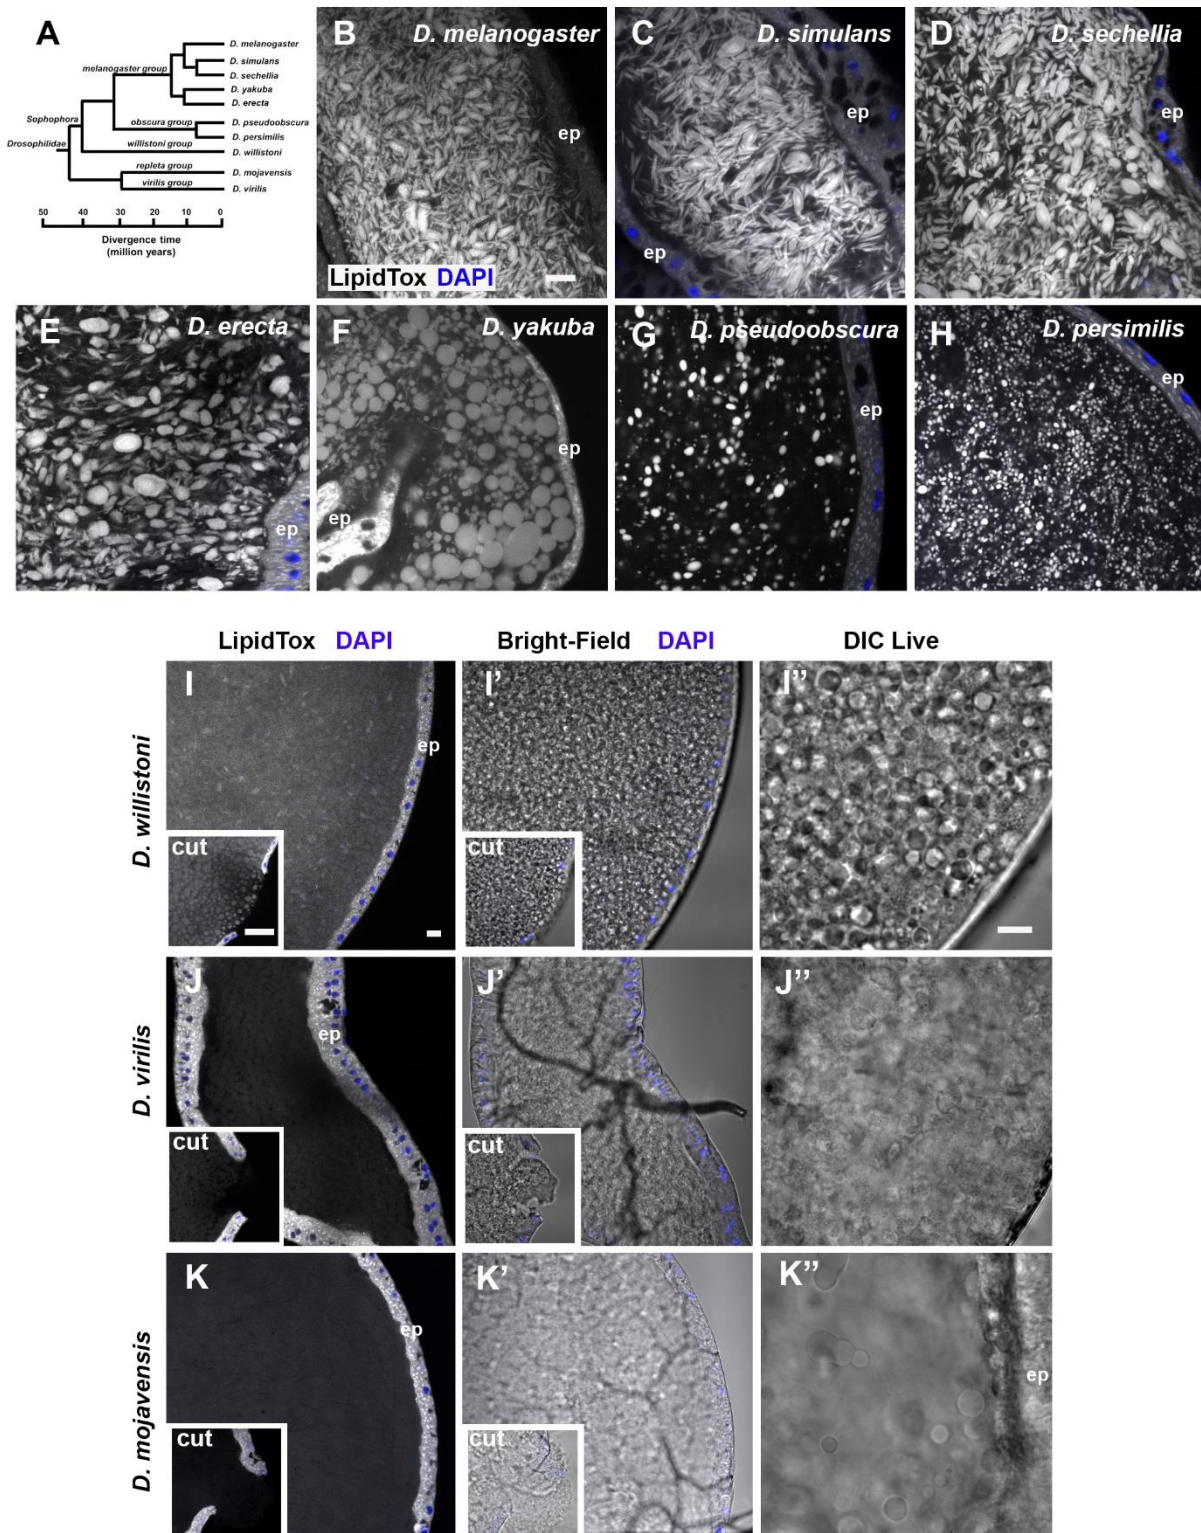

772

773

774 Fig. S1

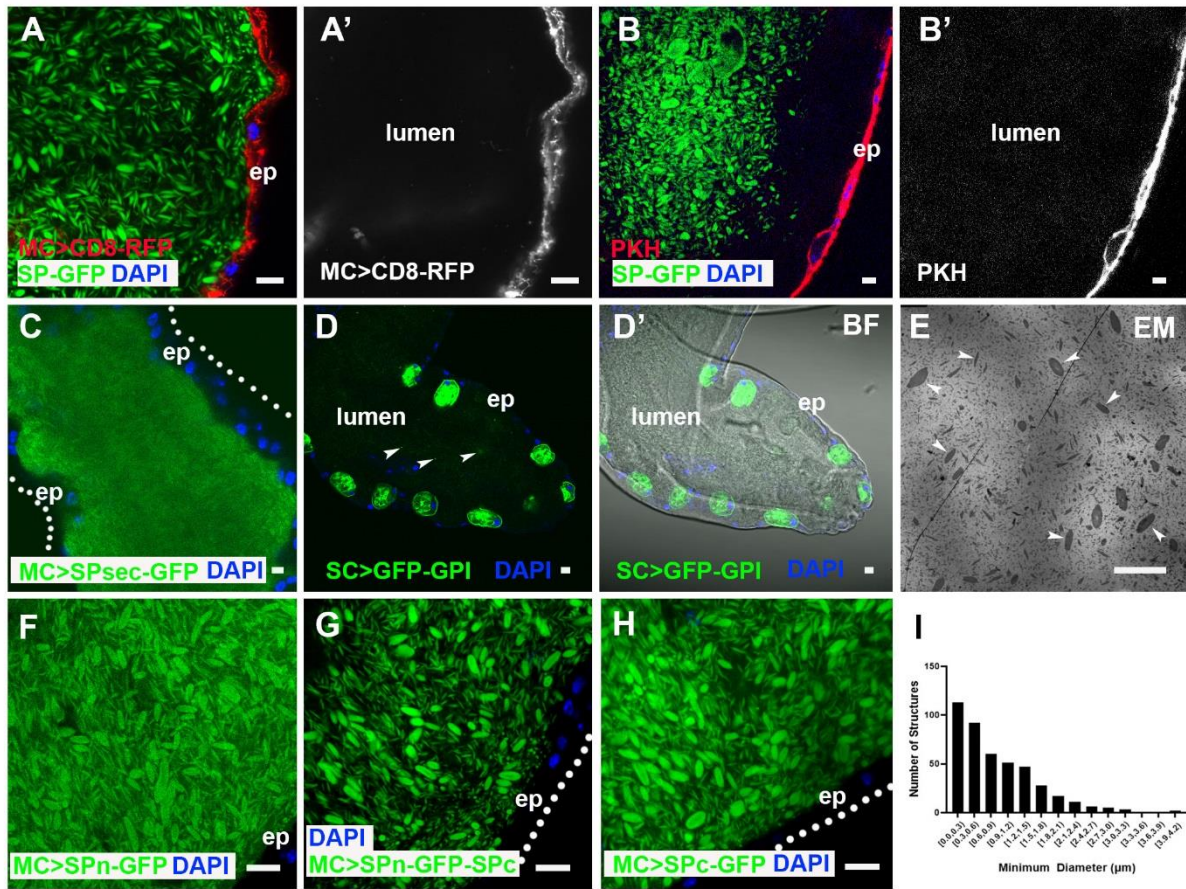

775

776

777 **Fig. S2**

778

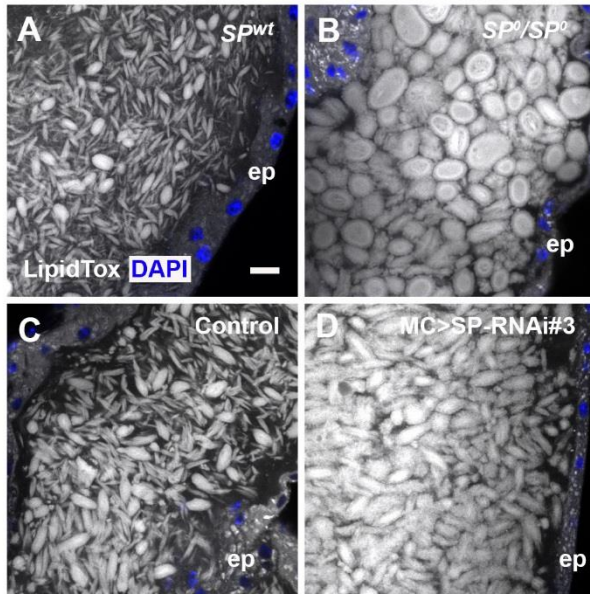

779

780 Fig. S3

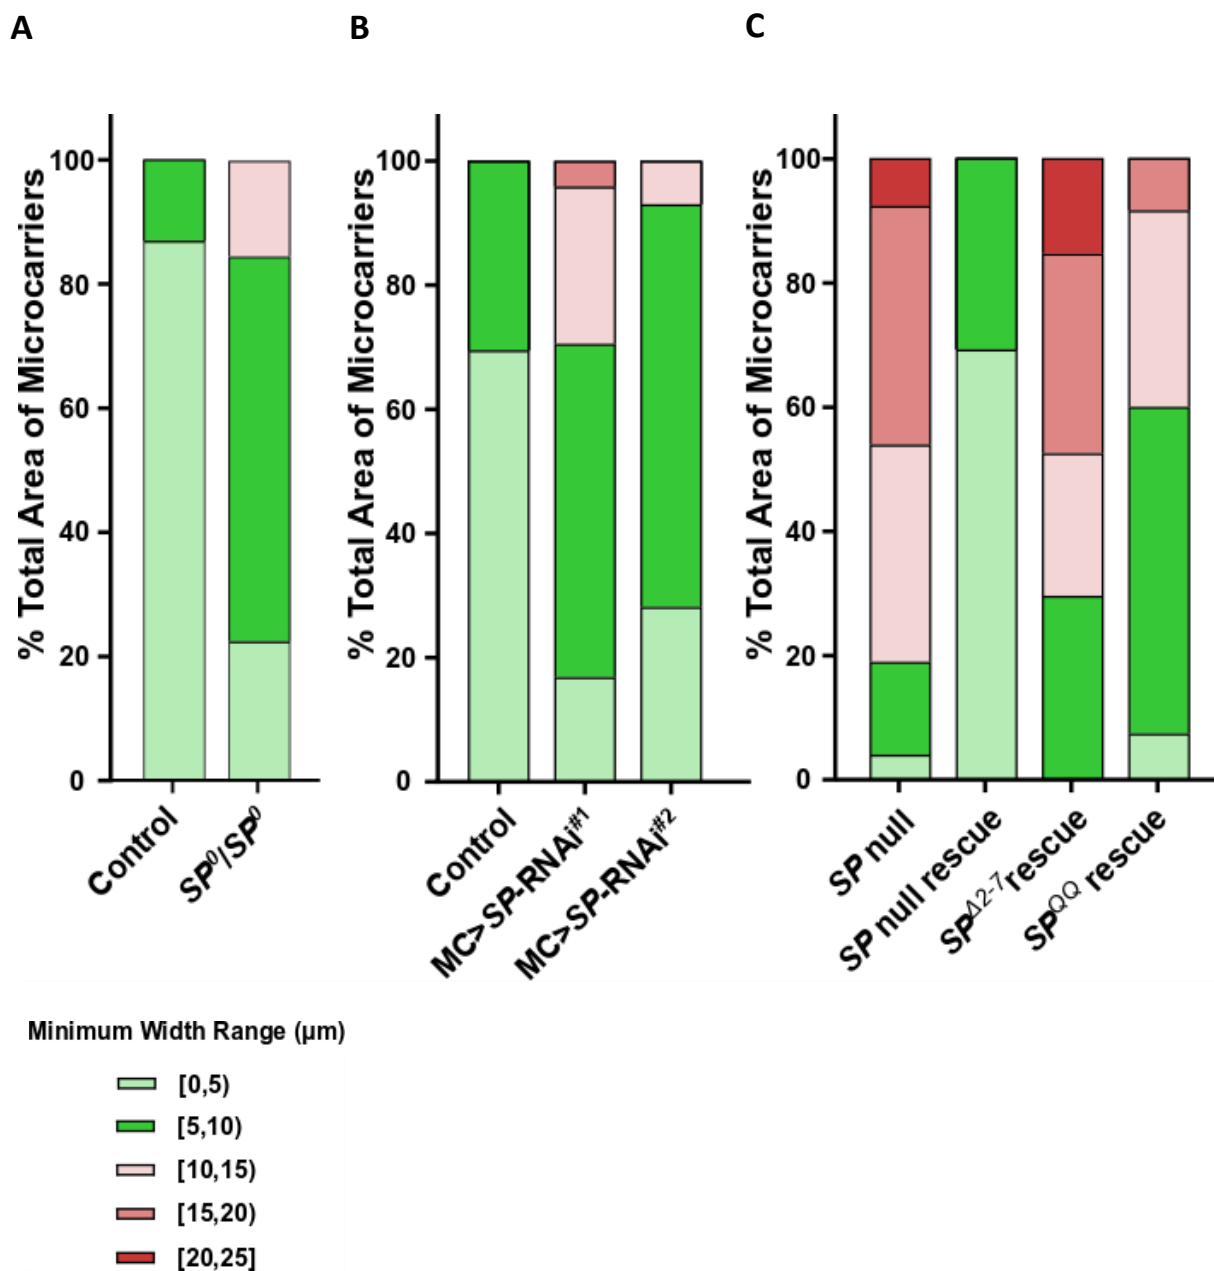

785

786

787

788

789 **Fig. S4**

|              | Signal peptides                            | Mature Sex Peptide         | Microcarriers            |
|--------------|--------------------------------------------|----------------------------|--------------------------|
| <i>D.mel</i> | MKT-LALFLVLVC--VLGLV-QA--WEWPWN---RKPTKFP  | IPSPNPR--DKWCRLNLGPAWGGR-C | large ellipsoid          |
| <i>D.sim</i> | MKT-LSLFLVLVC--LLGLV-QS--WEWPWN---RKPTKYPI | IPSPNPR--DKWCRLNLGPAWGGR-C | large ellipsoid          |
| <i>D.sec</i> | MKT-LSVFLVLVC--LLGLV-QS--WEWPWN---RQPTRYPI | IPSPNPR--DKWCRLNLGPAWGGR-C | large ellipsoid          |
| <i>D.yak</i> | MNT-VALLLVLLC--IVSLV-QS--WTWPWOK--KKP-KFPI | IPSPNPR--DKWCRLNLGPAWGGR-C | large spherical          |
| <i>D.ere</i> | MKA-VSLLLVLC--IVGLV-QS--WTWPWOK--KPPVKFP   | IPSPNPR--DKWCRLNLGPAWGGR-C | large spherical          |
| <i>D.pse</i> | MKVATSAMLLML--VEAAVGVPA-WGRMTS---RRPT--PK  | QSQAF--QKWCRNLNFGPAWGGRGC  | small spherical (sparse) |
| <i>D.per</i> | MKVATSAMLLML--VEAAVGVPA-WGRMTS---RRPT--PK  | QSQAF--QKWCRNLNFGPAWGGRGC  | small spherical (sparse) |
| <i>D.wil</i> | MQAPISILLLL---VLAIVSQSMA-----NPNPERGGDK    | GKWCRNLNLGPAYGGR-C         | tight-packed globular    |
| <i>D.vir</i> | MQATFSIIFIL---LSILCCSRG-----EYKTTKWPYPN    | KWCRNLNYGPLYGGR-C          | no lipophilic structures |
| <i>D.moj</i> |                                            | no Sex Peptide             | no lipophilic structures |

790

791

792

793

794

795

796

797

798

799



800 **Supporting information Movie 1.**

801 **Live imaging: Z stack through distal tip of SP-GFP AG.**

802

803
